# Supplementary material for: A checklist of the bats of Peninsular Malaysia and progress towards a DNA barcode reference library
Source: PubMed Central journal article supplement (PMC5526618; doi:10.1371/journal.pone.0179555), 2017-07-25
Supplement: pone.0179555.s010.pdf [file pone.0179555.s010.pdf]

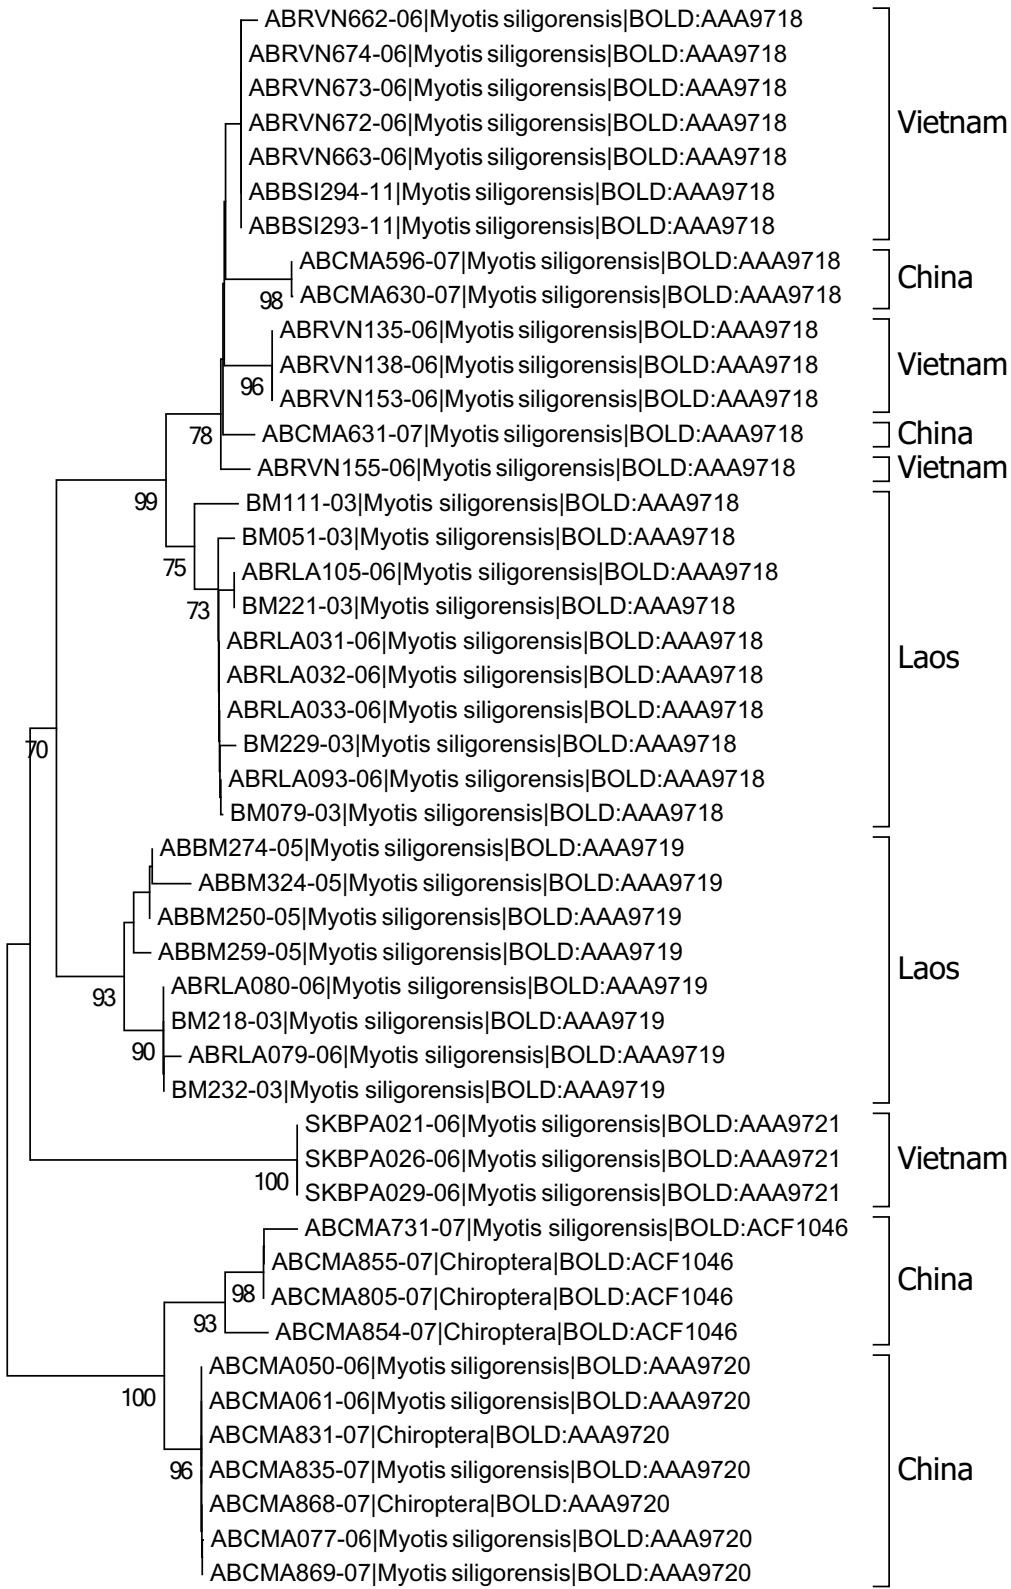

0.01
